# Supplementary material
Source: PubMed Central journal article supplement (PMC3332082)

Fig. S1.A. Mouse cdb3-GFP fusion proteins

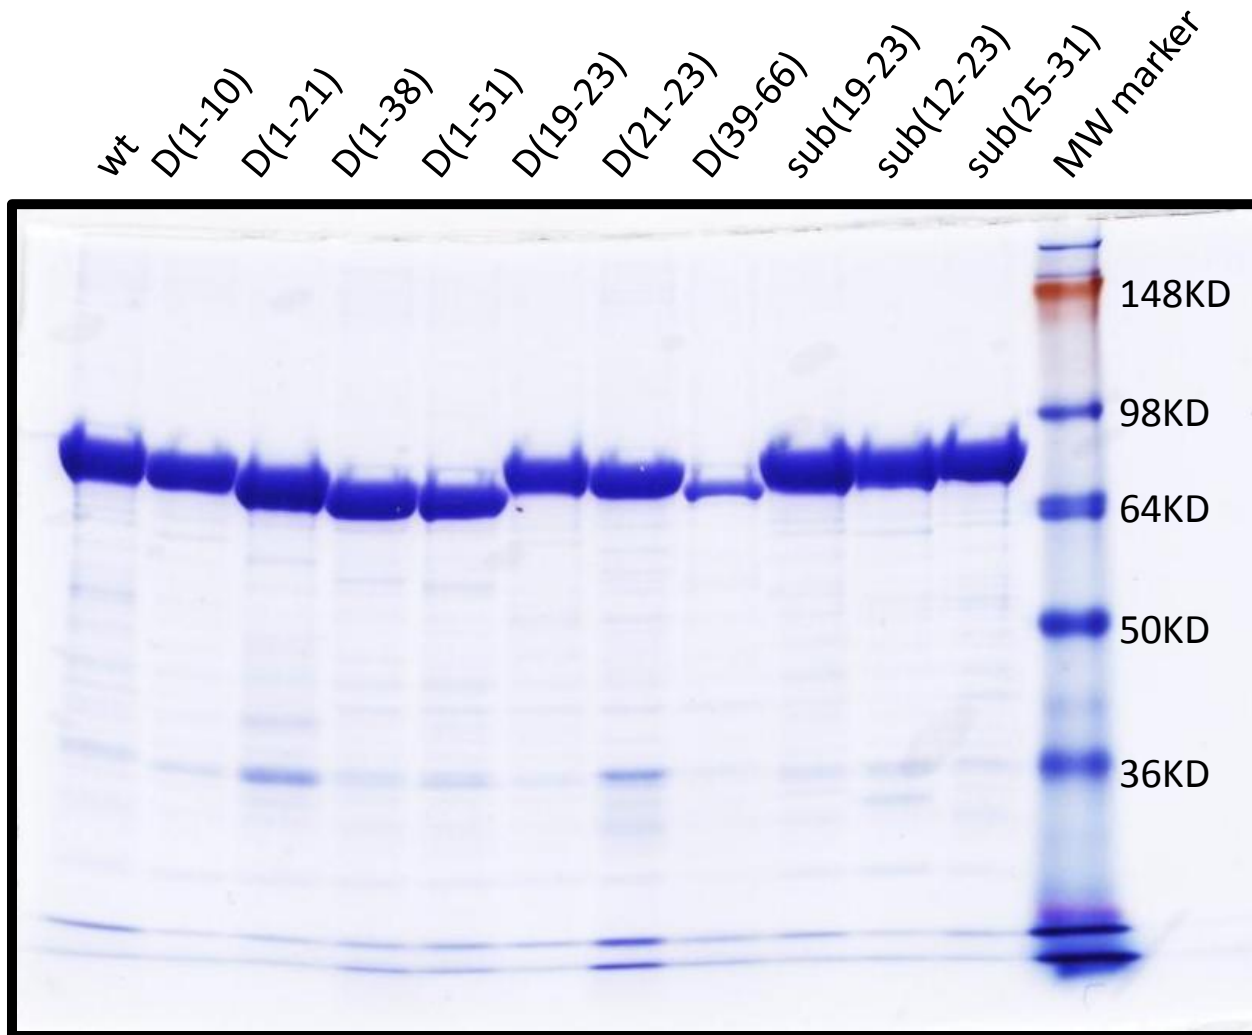

Supplement: NIHMS369316-supplement-1_si_001.pdf [file NIHMS369316-supplement-1_si_001.pdf]

Fig. S2.A. Mouse wild-type cdb3 and mutants

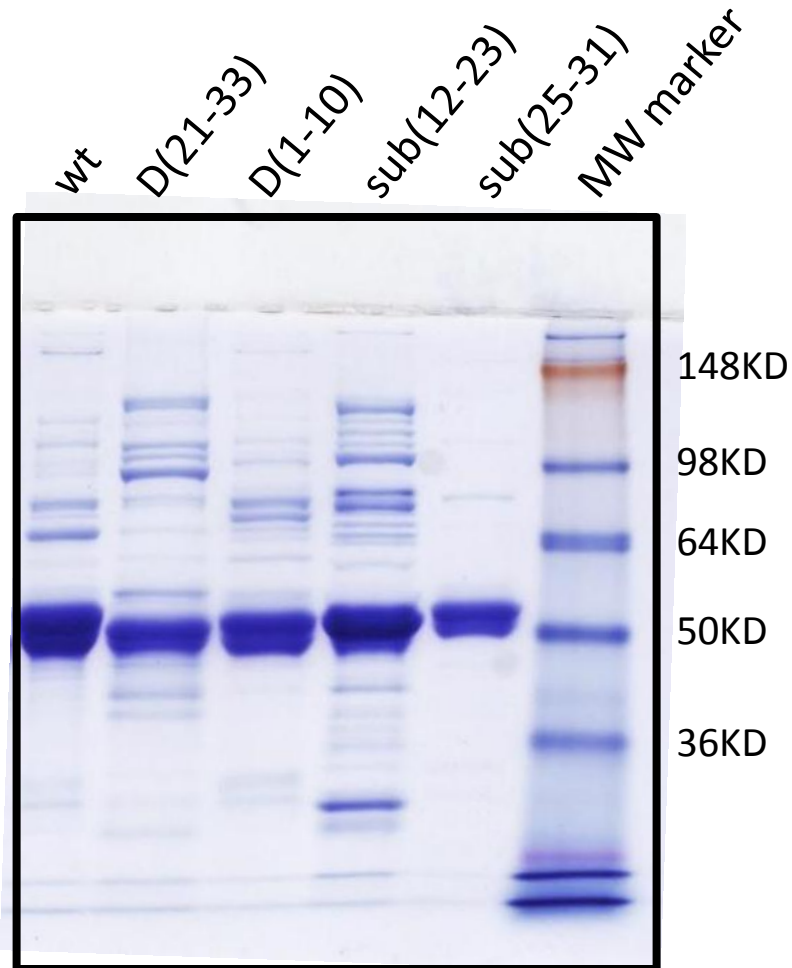

Fig. S2.B. The circular dichroism of mouse cdb3 and mutants

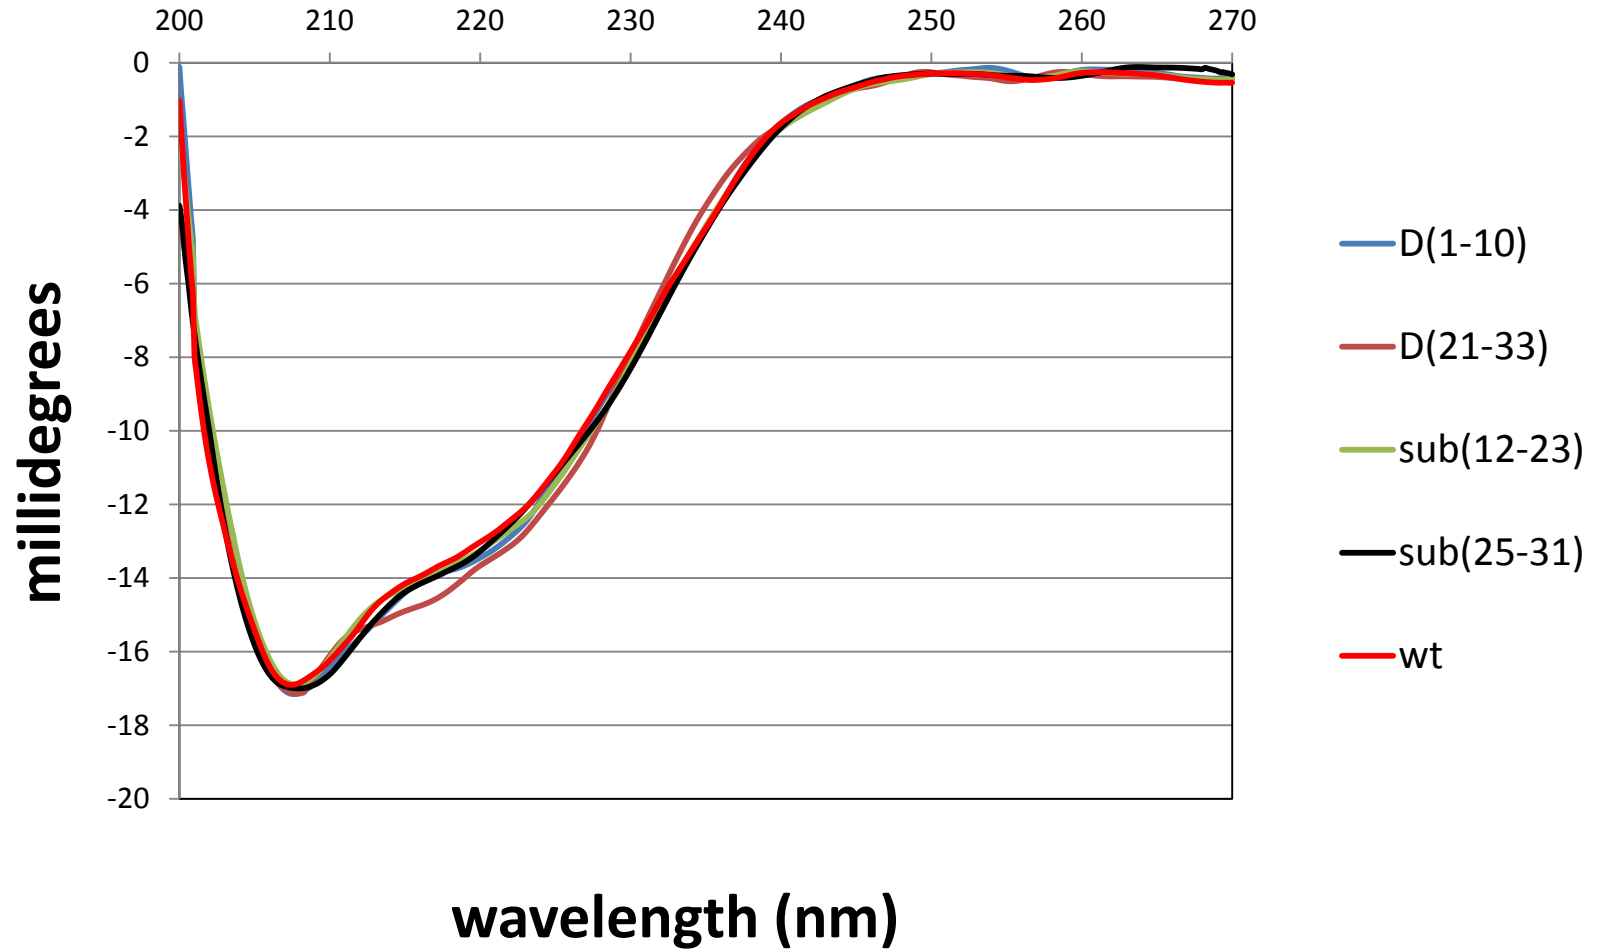

Supplement: NIHMS369316-supplement-2_si_002.pdf [file NIHMS369316-supplement-2_si_002.pdf]
